# Supplementary material for: Structural basis for recognition and remodeling of the TBP:DNA:NC2 complex by Mot1
Source: eLife journal article supplement (doi:10.7554/elife.07432), 2015-08-10
Supplement: supp [file elife-07432-supp-v1.zip]

Archive with 8 entries (8 files):
- elife_poa_e07432_Figure_6_figure_supplement_2.pdf
- elife_poa_e07432_Figure_7_figure_supplement_2.pdf
- elife_poa_e07432_Figure_6_figure_supplement_1.pdf
- elife_poa_e07432_Figure_4_figure_supplement_1.pdf
- elife_poa_e07432_Table_2_source_data_1.xlsx
- elife_poa_e07432_Figure_1_figure_supplement_1.pdf
- elife_poa_e07432_Figure_5_figure_supplement_1.pdf
- elife_poa_e07432_Figure_7_figure_supplement_1.pdf
