# Supplementary material for: Structural basis for recognition and remodeling of the TBP:DNA:NC2 complex by Mot1
Source: eLife journal article supplement (doi:10.7554/elife.07432), 2015-08-10
Supplement: supp [file elife-07432-supp-v1.zip › elife_poa_e07432_Table_2_source_data_1.xlsx]

## Sheet: xlinks
Id	Protein1	Protein2	XLType	Abs Pos1	Abs Pos2	Mr	Mz	z	Error rel. ppm	n seen	Δ Score	ld. Score	Decoy	Exp.
CPISVKLR-DLPPKIIR-a6-b5	Mot1_fl	Mot1_fl	intra-protein xl	796	1032	2018.17	673.732	3	0.2	9	0.54	41.64		ATPyS
LKIDVLK-IGQKR-a2-b4	Mot1_fl	Mot1_fl	intra-protein xl	1003	1219	1523.94	381.992	4	-1.6	1	0	40.95		ATPyS
IREPKTTALIFASGK-MVITGAKSEK-a5-b7	TBP_fl	TBP_fl	intra-protein xl	68	87	2789.54	698.392	4	0.5	13	0	40.16		ATPyS
GGKESLGDAELEYGK-SEVKK-a3-b4	Mot1_fl	Mot1_fl	intra-protein xl	1039	883	2237.11	560.285	4	1	8	0.57	38.03		ATPyS
AGSGEAIKR-VDQKNVGFK-a8-b4	Mot1_fl	Mot1_fl	intra-protein xl	138	1074	2017.06	673.36	3	-1.6	3	0	37.8		ATPyS
LDLKNIALR-NAEYNPKR-a4-b7	TBP_fl	TBP_fl	intra-protein xl	41	57	2141.16	714.729	3	2.1	7	0	37.13		ATPyS
GGKESLGDAELEYGK-NVGFKR-a3-b5	Mot1_fl	Mot1_fl	intra-protein xl	1039	1079	2367.17	592.801	4	1.4	9	0.59	36.91		ATPyS
IREPKTTALIFASGK-MVKPK-a5-b3	TBP_fl	TBP_fl	intra-protein xl	68	159	2328.33	583.089	4	0.8	4	0	36.9		ATPyS
KTISYEHVYK-ACEEEKK-a1-b6	NC2beta_fl	NC2beta_fl	intra-protein xl	64	64	2255.08	564.778	4	0.6	28	0.72	36.65		ATPyS
NKQTILYSR-VDQKNVGFK-a2-b4	Mot1_fl	Mot1_fl	intra-protein xl	919	1074	2251.2	751.407	3	0.6	2	0	36.31		ATPyS
IVLTGAKVR-MVKPK-a7-b3	TBP_fl	TBP_fl	intra-protein xl	176	159	1653	552.009	3	1.7	4	0	36.23		ATPyS
DIMKK-FKYSR-a4-b2	Mot1_fl	Mot1_fl	intra-protein xl	1123	1147	1428.74	477.255	3	-1.1	1	0	35.84		ATPyS
EASSKVLSK-KVLPFILR-a5-b1	Mot1_fl	Mot1_fl	intra-protein xl	743	1012	2028.2	508.057	4	0.1	6	0.26	35.49		ATPyS
LDLKNIALR-MVKPK-a4-b3	TBP_fl	TBP_fl	intra-protein xl	41	159	1752.03	439.016	4	-0.5	2	0	35.37		ATPyS
KFFPFVAAEIYKR-IGQKR-a1-b4	Mot1_fl	Mot1_fl	intra-protein xl	865	1219	2311.28	578.829	4	0.5	1	0.32	34.92		ATPyS
NDDENTLPKATVDK-NSVVPKESK-a9-b6	NC2beta_fl	NC2beta_fl	intra-protein xl	14	35	2641.31	661.336	4	2	9	0.61	34.03		ATPyS
SEKSSR-MVKPK-a3-b3	TBP_fl	TBP_fl	intra-protein xl	88	159	1389.73	464.251	3	0.1	4	0	34.02		ATPyS
GGKESLGDAELEYGK-VDQKNVGFK-a3-b4	Mot1_fl	Mot1_fl	intra-protein xl	1039	1074	2681.32	671.337	4	-0.5	6	0.44	33.97		ATPyS
LKIDVLKDLPPK-CPISVKLR-a7-b6	Mot1_fl	Mot1_fl	intra-protein xl	1008	815	2445.44	612.368	4	0.4	6	0	33.78		ATPyS
IREPKTTALIFASGK-SEKSSR-a5-b3	TBP_fl	TBP_fl	intra-protein xl	68	90	2419.31	605.835	4	1.3	2	0.26	33.76		ATPyS
CPISVKLR-SEVKK-a6-b4	Mot1_fl	Mot1_fl	intra-protein xl	796	883	1656.92	553.315	3	-1.7	1	0	33.67		ATPyS
AGSGEAIKR-SEVKK-a8-b4	Mot1_fl	Mot1_fl	intra-protein xl	138	883	1572.85	525.291	3	1	3	0	33.49		ATPyS
AGSGEAIKR-VDSKLFSK-a8-b4	Mot1_fl	Mot1_fl	intra-protein xl	138	215	1906.01	477.511	4	-1.3	4	0.29	33.36		ATPyS
KLTRFPISR-QESQKK-a1-b5	NC2alpha_fl	NC2alpha_fl	intra-protein xl	10	8	1959.09	392.826	5	0.8	5	0.5	33.17		ATPyS
GGKESLGDAELEYGKVDQK-NVGFKR-a3-b5	Mot1_fl	Mot1_fl	intra-protein xl	1039	1079	2837.42	710.363	4	1.1	5	0.6	33.08		ATPyS
YAKIIHK-SEKSSR-a3-b3	TBP_fl	TBP_fl	intra-protein xl	99	90	1659.9	554.307	3	1	3	0	32.89		ATPyS
CPISVKLR-IGQKR-a6-b4	Mot1_fl	Mot1_fl	intra-protein xl	796	1219	1667.95	417.995	4	-0.3	1	0	32.6		ATPyS
VKALEDIISLCGGEDLGSK-NKQTILYSR-a2-b2	Mot1_fl	Mot1_fl	intra-protein xl	1086	938	3220.67	806.175	4	1.2	3	0.24	31.97		ATPyS
GGKESLGDAELEYGK-VDQKNVGFKR-a3-b4	Mot1_fl	Mot1_fl	intra-protein xl	1039	1074	2837.42	568.492	5	0.2	2	0.42	31.89		ATPyS
IYEILVTDKFNDFVDDR-AGSGEAIKR-a9-b8	Mot1_fl	Mot1_fl	intra-protein xl	209	157	3084.55	1029.19	3	2.3	2	0	31.45		ATPyS
NKQTILYSR-CPISVKLR-a2-b6	Mot1_fl	Mot1_fl	intra-protein xl	919	815	2189.2	730.741	3	0.1	3	0.66	30.95		ATPyS
NISGNIDREASSKVLSK-KVLPFILR-a13-b1	Mot1_fl	Mot1_fl	intra-protein xl	743	1012	2897.64	725.417	4	0.4	10	0	30.61		ATPyS
ACEEEKKK-IDKFK-a6-b3	NC2beta_fl	NC2beta_fl	intra-protein xl	62	109	1765.89	589.639	3	1.2	1	0.67	30.41		ATPyS
DLFLAVSHIGHFKDSTEVSCK-EIDEKGGK-a13-b5	Mot1_fl	Mot1_fl	intra-protein xl	1076	1055	3359.64	840.918	4	1.5	5	0	30.15		ATPyS
GGKESLGDAELEYGK-NTLEEKVMNLQSFK-a3-b6	Mot1_fl	Mot1_fl	intra-protein xl	1039	1236	3327.62	1110.21	3	-0.2	1	0.17	30.12		ATPyS
VLSKVIPTLGFSTNTK-KVLPFILR-a4-b1	Mot1_fl	Mot1_fl	intra-protein xl	747	1012	2784.65	697.171	4	0.5	8	0.89	29.95		ATPyS
TLQVLTFLCSEIYKTNR-VDQKNVGFK-a14-b4	Mot1_fl	Mot1_fl	intra-protein xl	842	1074	3214.67	1072.56	3	0.1	4	0.25	29.87		ATPyS
IGQKR-SEVKK-a4-b4	Mot1_fl	Mot1_fl	intra-protein xl	1200	883	1285.74	429.586	3	0.5	2	0	29.78		ATPyS
FFTTLNTAQSKVLK-KVLPFILR-a11-b1	Mot1_fl	Mot1_fl	intra-protein xl	17	1012	2677.56	670.397	4	-0.5	1	0.67	29.43		ATPyS
LEKFFTTLNTAQSK-KVLPFILR-a3-b1	Mot1_fl	Mot1_fl	intra-protein xl	6	1012	2707.53	903.519	3	0.8	3	0.69	29.26		ATPyS
EASSKVLSK-KVLPFILRR-a5-b1	Mot1_fl	Mot1_fl	intra-protein xl	743	1012	2184.3	729.108	3	0.2	4	0.66	29.13		ATPyS
LEKFFTTLNTAQSK-MSDSEIEKTHK-a3-b8	Mot1_fl	Mot1_fl	intra-protein xl	6	1001	3026.49	757.63	4	-0.2	2	0.74	28.88		ATPyS
IREPKTTALIFASGK-LDLKNIALR-a5-b4	TBP_fl	TBP_fl	intra-protein xl	68	43	2781.61	696.409	4	-2	1	0.27	28.8		ATPyS
NMEQFKNRE-KSSSR-a6-b1	NC2alpha_fl	NC2alpha_fl	intra-protein xl	92	62	1853.87	618.965	3	1.1	2	0.79	28.66		ATPyS
AGSGEAIKR-DIMKK-a8-b4	Mot1_fl	Mot1_fl	intra-protein xl	138	1142	1616.85	539.959	3	-1	2	0.68	28.61		ATPyS
LYREIDEKGGK-VDQKNVGFK-a8-b4	Mot1_fl	Mot1_fl	intra-protein xl	1036	1074	2436.27	610.075	4	1.8	2	0	28.51		ATPyS
LEKFFTTLNTAQSK-NKQTILYSR-a3-b2	Mot1_fl	Mot1_fl	intra-protein xl	6	938	2844.51	712.134	4	1.5	1	0.18	28.4		ATPyS
EYGSLNVKMSDSEIEK-KVLPFILR-a8-b1	Mot1_fl	Mot1_fl	intra-protein xl	974	1012	2908.53	970.518	3	1.4	4	0.48	27.74		ATPyS
NTLEEKVMNLQSFK-VDQKNVGFK-a6-b4	Mot1_fl	Mot1_fl	intra-protein xl	1217	1074	2809.43	937.484	3	-0.8	2	0	27.18		ATPyS
MSDSEIEKTHK-NKQTILYSR-a8-b2	Mot1_fl	Mot1_fl	intra-protein xl	982	938	2521.25	631.32	4	0.8	2	0.79	27.15		ATPyS
TRDLFLAVSHIGHFKDSTEVSCK-EIDEKGGK-a15-b5	Mot1_fl	Mot1_fl	intra-protein xl	1076	1055	3616.79	724.366	5	1.9	4	0.39	26.73		ATPyS
MSDSEIEKTHK-KVLPFILR-a8-b1	Mot1_fl	Mot1_fl	intra-protein xl	982	1012	2384.28	795.769	3	2.5	4	0.72	26.44		ATPyS
IREPKTTALIFASGK-NAEYNPKR-a5-b7	TBP_fl	TBP_fl	intra-protein xl	68	57	2717.45	680.371	4	0.7	2	0	26.28		ATPyS
KFFPFVAAEIYK-CPISVKLR-a1-b6	Mot1_fl	Mot1_fl	intra-protein xl	865	815	2526.37	843.13	3	-1.4	2	0.54	26.22		ATPyS
NAEYNPKR-SEKSSR-a7-b3	TBP_fl	TBP_fl	intra-protein xl	55	90	1778.86	445.722	4	0	1	0.59	24.95		ATPyS
IAKLEHVEANFLSDIDFK-AGSGEAIKR-a3-b8	Mot1_fl	Mot1_fl	intra-protein xl	115	157	3071.59	768.906	4	-0.1	1	0.43	22.95		ATPyS
ESLGDAELEYGKVDQKNVGFK-NKQTILYSR-a16-b2	Mot1_fl	Mot1_fl	intra-protein xl	1055	938	3542.79	886.705	4	0.1	2	0.61	22.53		ATPyS
LFQNAKLQFER-MVKPK-a6-b3	NC2beta_fl	TBP_fl	inter-protein xl	130	159	2090.14	523.542	4	0.5	6	0	39.91		ATPyS
AGSGEAIKR-LDLKNIALR-a8-b4	Mot1_fl	TBP_fl	inter-protein xl	138	43	2038.15	510.546	4	-0.6	9	0	38.26		ATPyS
KTISYEHVYK-LDLKNIALR-a1-b4	NC2beta_fl	TBP_fl	inter-protein xl	64	43	2417.33	806.785	3	-0.1	6	0.27	38		ATPyS
NSVVPKESK-SEKSSR-a6-b3	NC2beta_fl	TBP_fl	inter-protein xl	33	90	1774.91	592.643	3	0.1	4	0	37.57		ATPyS
AGSGEAIKR-NAEYNPKR-a8-b7	Mot1_fl	TBP_fl	inter-protein xl	138	57	1973.99	659.006	3	1	9	0	37.1		ATPyS
KKTISYEHVYK-MVKPK-a2-b3	NC2beta_fl	TBP_fl	inter-protein xl	64	159	2092.14	419.436	5	-0.1	5	0.83	36.58		ATPyS
LDLKNIALR-SEVKK-a4-b4	TBP_fl	Mot1_fl	inter-protein xl	41	883	1740.02	581.013	3	0	3	0	36.48		ATPyS
AGSGEAIKR-ACEEEKKK-a8-b6	Mot1_fl	NC2beta_fl	inter-protein xl	138	64	2004	669.007	3	0.8	1	0	35.75		ATPyS
NVGFKR-KSSSR-a5-b1	Mot1_fl	NC2alpha_fl	inter-protein xl	1060	62	1378.73	345.69	4	-1.2	4	0	35.54		ATPyS
EIDEKGGK-KKSSSR-a5-b2	Mot1_fl	NC2alpha_fl	inter-protein xl	1036	62	1661.86	554.961	3	0.2	9	0.9	35.51		ATPyS
IREPKTTALIFASGK-FFTTLNTAQSKVLK-a5-b11	TBP_fl	Mot1_fl	inter-protein xl	68	36	3323.85	665.777	5	-1	10	0.25	35.38		ATPyS
LYREIDEKGGK-KKSSSR-a8-b2	Mot1_fl	NC2alpha_fl	inter-protein xl	1036	62	2094.11	524.535	4	0.9	2	0.82	34.88		ATPyS
SEKSSR-CKDLK-a3-b2	TBP_fl	Mot1_fl	inter-protein xl	88	543	1450.71	484.578	3	0.8	3	0	33.55		ATPyS
ACEEEKK-SEKSSR-a6-b3	NC2beta_fl	TBP_fl	inter-protein xl	62	90	1680.76	561.262	3	0.3	2	0.75	33.48		ATPyS
EIDEKGGK-KSSSR-a5-b1	Mot1_fl	NC2alpha_fl	inter-protein xl	1036	62	1533.77	512.263	3	1.2	9	0.46	33.42		ATPyS
KKTISYEHVYK-LDLKNIALR-a2-b4	NC2beta_fl	TBP_fl	inter-protein xl	64	43	2545.43	849.484	3	0.9	9	0.51	33.35		ATPyS
NSVVPKESK-KSSSR-a6-b1	NC2beta_fl	NC2alpha_fl	inter-protein xl	33	62	1645.86	412.474	4	-0.2	3	0	33.26		ATPyS
NMEQFKNRE-VDQKNVGFK-a6-b4	NC2alpha_fl	Mot1_fl	inter-protein xl	92	1074	2324.12	582.038	4	-0.9	2	0.8	33.13		ATPyS
KKTISYEHVYK-LDLKNIALR-a1-b4	NC2beta_fl	TBP_fl	inter-protein xl	63	43	2545.43	510.093	5	-0.6	1	0.78	33.02		ATPyS
GGKESLGDAELEYGK-KSSSR-a3-b1	Mot1_fl	NC2alpha_fl	inter-protein xl	1039	62	2211.07	738.03	3	0.4	4	0.58	32.99		ATPyS
KSSSR-KYKFK-a1-b1	NC2alpha_fl	Mot1_fl	inter-protein xl	62	1143	1371.75	343.946	4	-0.1	2	0.82	32.82		ATPyS
IREPKTTALIFASGK-EFVEDKDGLCR-a5-b6	TBP_fl	Mot1_fl	inter-protein xl	68	294	3093.58	774.404	4	1	1	0.32	32.55		ATPyS
VDQKNVGFK-KSSSR-a4-b1	Mot1_fl	NC2alpha_fl	inter-protein xl	1055	62	1692.88	424.228	4	0.1	4	0.53	32.53		ATPyS
DIMKK-KSSSR-a4-b1	Mot1_fl	NC2alpha_fl	inter-protein xl	1123	62	1292.68	431.9	3	0.7	2	0.49	32.02		ATPyS
IAKLEHVEANFLSDIDFK-MVITGAKSEK-a3-b7	Mot1_fl	TBP_fl	inter-protein xl	115	87	3246.69	812.679	4	0.3	1	0.6	31.97		ATPyS
AGSGEAIKR-NMEQFKNRE-a8-b6	Mot1_fl	NC2alpha_fl	inter-protein xl	138	92	2178.05	727.025	3	1.1	3	0	31.91		ATPyS
KKTISYEHVYK-SEKSSR-a2-b3	NC2beta_fl	TBP_fl	inter-protein xl	64	90	2183.13	437.633	5	2.4	2	0.74	31.64		ATPyS
LYREIDEKGGK-KSSSR-a8-b1	Mot1_fl	NC2alpha_fl	inter-protein xl	1036	62	1966.01	492.511	4	1.1	6	0	31.5		ATPyS
EIDEKGGK-KKSSSR-a5-b1	Mot1_fl	NC2alpha_fl	inter-protein xl	1036	61	1661.86	554.96	3	-0.6	1	0.94	31.46		ATPyS
GHMNMEKNDDENTLPK-NMEQFKNRE-a7-b6	NC2beta_fl	NC2alpha_fl	inter-protein xl	5	92	3162.38	791.603	4	0.6	2	0	31.44		ATPyS
RIMQLNEDIGKIGASVPVVASK-KKTISYEHVYK-a11-b2	NC2alpha_fl	NC2beta_fl	inter-protein xl	31	66	3815.07	954.774	4	-0.1	4	0.5	31.03		ATPyS
KTISYEHVYK-SEKSSR-a1-b3	NC2beta_fl	TBP_fl	inter-protein xl	64	90	2055.03	514.765	4	0.8	2	0.68	30.98		ATPyS
QKPSKIDK-QESQKK-a2-b5	NC2beta_fl	NC2alpha_fl	inter-protein xl	101	8	1784.96	358.001	5	0.3	8	0.89	30.89		ATPyS
AGSGEAIKR-MVKPK-a8-b3	Mot1_fl	TBP_fl	inter-protein xl	138	159	1584.87	397.224	4	-0.4	1	0	30.88		ATPyS
NMEQFKNRE-SEKSSR-a6-b3	NC2alpha_fl	TBP_fl	inter-protein xl	92	90	1982.91	661.979	3	0.6	2	0	30.88		ATPyS
NMEQFKNRE-FKYSR-a6-b2	NC2alpha_fl	Mot1_fl	inter-protein xl	92	1147	1989.94	664.321	3	0.8	2	0	30.83		ATPyS
IREPKTTALIFASGK-ACEEEKKK-a5-b6	TBP_fl	NC2beta_fl	inter-protein xl	68	64	2747.45	550.498	5	-0.9	3	0.3	30.63		ATPyS
LEKFFTTLNTAQSK-NSVVPKESK-a3-b6	Mot1_fl	NC2beta_fl	inter-protein xl	6	35	2709.42	904.149	3	0.1	3	0	30.53		ATPyS
KKTISYEHVYK-NAEYNPKR-a2-b7	NC2beta_fl	TBP_fl	inter-protein xl	64	57	2481.27	828.097	3	1	9	0.72	29.65		ATPyS
DSGLTMEELHSQQIKLFQNAK-MVKPK-a15-b3	NC2beta_fl	TBP_fl	inter-protein xl	124	159	3113.59	779.406	4	1.5	1	0.36	29.43		ATPyS
KSSSR-KYKFK-a1-b3	NC2alpha_fl	Mot1_fl	inter-protein xl	62	1145	1371.75	458.258	3	0.5	2	0.79	29.43		ATPyS
KTISYEHVYK-NAEYNPKR-a1-b7	NC2beta_fl	TBP_fl	inter-protein xl	64	57	2353.17	471.642	5	0.3	6	0.68	29.32		ATPyS
VDQKNVGFKR-KKSSSR-a4-b2	Mot1_fl	NC2alpha_fl	inter-protein xl	1055	62	1977.08	396.423	5	-0.1	3	0.78	29.26		ATPyS
ESLGDAELEYGKVDQK-KSSSR-a12-b1	Mot1_fl	NC2alpha_fl	inter-protein xl	1051	62	2439.18	610.802	4	0.2	2	0.93	29.12		ATPyS
GGKESLGDAELEYGK-KKSSSR-a3-b2	Mot1_fl	NC2alpha_fl	inter-protein xl	1039	62	2339.16	780.728	3	0.2	1	0.35	29.08		ATPyS
MVSSMLPKNSVVPK-VDQKNVGFK-a8-b4	NC2beta_fl	Mot1_fl	inter-protein xl	27	1074	2645.39	662.356	4	0.9	4	0.44	28.7		ATPyS
KVLVICPSSLTGHWK-KKSSSR-a1-b2	Mot1_fl	NC2alpha_fl	inter-protein xl	846	62	2511.36	503.28	5	-0.4	2	0.89	28.57		ATPyS
ESLGDAELEYGKVDQK-KKSSSR-a12-b2	Mot1_fl	NC2alpha_fl	inter-protein xl	1051	62	2567.27	856.766	3	0.6	2	0.86	28.25		ATPyS
KKTISYEHVYK-AGSGEAIKR-a2-b8	NC2beta_fl	Mot1_fl	inter-protein xl	64	157	2378.26	476.66	5	1	3	0.75	28.21		ATPyS
NTLEEKVMNLQSFK-NSVVPKESK-a6-b6	Mot1_fl	NC2beta_fl	inter-protein xl	1217	35	2762.42	921.814	3	1.1	3	0.12	27.9		ATPyS
CPISVKLR-KKSSSR-a6-b2	Mot1_fl	NC2alpha_fl	inter-protein xl	796	62	1758.98	440.753	4	0.9	2	0.89	27.88		ATPyS
QESQKK-IDKFK-a5-b3	NC2alpha_fl	NC2beta_fl	inter-protein xl	8	109	1491.79	373.956	4	-0.1	1	0	27.63		ATPyS
VDQKNVGFKR-KSSSR-a4-b1	Mot1_fl	NC2alpha_fl	inter-protein xl	1055	62	1848.98	463.253	4	-0.5	2	0.32	27.63		ATPyS
RIMQLNEDIGKIGASVPVVASK-KTISYEHVYK-a11-b1	NC2alpha_fl	NC2beta_fl	inter-protein xl	31	66	3686.96	922.749	4	-1.9	2	0.48	27.51		ATPyS
AGSGEAIKR-SEKSSR-a8-b3	Mot1_fl	TBP_fl	inter-protein xl	138	90	1675.85	419.97	4	0.4	2	0.6	27.46		ATPyS
RIMQLNEDIGKIGASVPVVASK-SLEFNEKFVRK-a11-b7	NC2alpha_fl	Mot1_fl	inter-protein xl	31	714	3816.06	764.219	5	-0.7	1	0.25	27.08		ATPyS
MSDSEIEKTHK-NSVVPKESK-a8-b6	Mot1_fl	NC2beta_fl	inter-protein xl	982	35	2386.17	796.399	3	2	3	0	26.9		ATPyS
NSVVPKESK-KKSSSR-a6-b2	NC2beta_fl	NC2alpha_fl	inter-protein xl	33	62	1773.96	592.327	3	-1.2	1	0	26.85		ATPyS
IMQLNEDIGKIGASVPVVASK-NAEYNPKR-a10-b7	NC2alpha_fl	TBP_fl	inter-protein xl	31	57	3254.7	814.682	4	-0.2	1	0.27	26.16		ATPyS
ACEEEKKK-FKYSR-a6-b2	NC2beta_fl	Mot1_fl	inter-protein xl	62	1147	1815.88	454.978	4	0	1	0	26.14		ATPyS
GHMNMEKNDDENTLPK-NAEYNPKR-a7-b7	NC2beta_fl	TBP_fl	inter-protein xl	5	57	2958.32	740.589	4	0.2	4	0	26.07		ATPyS
KKSSSR-DIMKK-a1-b4	NC2alpha_fl	Mot1_fl	inter-protein xl	61	1142	1420.77	474.598	3	-0.2	1	0.9	25.96		ATPyS
QKPSKIDK-MVKPK-a5-b3	NC2beta_fl	TBP_fl	inter-protein xl	104	159	1639.93	410.992	4	1.4	4	0.75	25.54		ATPyS
KLTRFPISR-QKPSKIDK-a1-b2	NC2alpha_fl	NC2beta_fl	inter-protein xl	10	103	2155.25	432.058	5	0.4	1	0.7	25.47		ATPyS
GHMNMEKNDDENTLPK-FFTTLNTAQSKVLK-a7-b11	NC2beta_fl	Mot1_fl	inter-protein xl	5	36	3564.73	892.189	4	0.7	2	0	25.45		ATPyS
FQMENKTLEK-IDKFK-a6-b3	decoy_reverse_NC2alpha_fl	NC2beta_fl	decoy inter-protein xl	10	109	2012.02	504.013	4	-4.2	7	0	25.38	x	ATPyS
NSVVPKESK-EIDEKGGK-a6-b5	NC2beta_fl	Mot1_fl	inter-protein xl	33	1055	1957	653.342	3	1.1	2	0	24.98		ATPyS
SGINVVGKDEILK-SEKSSR-a8-b3	Mot1_fl	TBP_fl	inter-protein xl	458	90	2159.14	720.722	3	-0.2	3	0.68	24.97		ATPyS
NAEYNPKR-KSSSR-a7-b1	TBP_fl	NC2alpha_fl	inter-protein xl	55	62	1649.81	550.946	3	1	4	0.5	24.77		ATPyS
IMQLNEDIGKIGASVPVVASK-KKTISYEHVYK-a10-b2	NC2alpha_fl	NC2beta_fl	inter-protein xl	31	66	3658.97	610.836	6	1	2	0.52	24.6		ATPyS
EYGSLNVKMSDSEIEK-NAEYNPKR-a8-b7	Mot1_fl	TBP_fl	inter-protein xl	974	57	2914.37	972.464	3	0.9	4	0.57	24.25		ATPyS
EIDEKGGK-SEKSSR-a5-b3	Mot1_fl	TBP_fl	inter-protein xl	1036	90	1662.81	416.71	4	0.5	2	0.45	23.52		ATPyS
IMQLNEDIGKIGASVPVVASK-KTISYEHVYK-a10-b1	NC2alpha_fl	NC2beta_fl	inter-protein xl	31	66	3530.86	707.18	5	-1.9	3	0.36	22.74		ATPyS
IGQKR-MVKPK-a4-b3	Mot1_fl	TBP_fl	inter-protein xl	1200	157	1297.75	325.446	4	-1.9	1	0	39.89		ADP-BeF
AGSGEAIKR-LDLKNIALR-a8-b4	Mot1_fl	TBP_fl	inter-protein xl	138	41	2038.15	510.546	4	-0.6	9	0	38.57		ADP-BeF
KKTISYEHVYK-LDLKNIALR-a1-b4	NC2beta_fl	TBP_fl	inter-protein xl	63	41	2545.42	510.093	5	-1.2	3	0.6	38.46		ADP-BeF
MVSSMLPKNSVVPK-MVKPK-a8-b3	NC2beta_fl	TBP_fl	inter-protein xl	27	157	2213.2	554.307	4	-1	5	0.37	37.26		ADP-BeF
KTISYEHVYK-LDLKNIALR-a1-b4	NC2beta_fl	TBP_fl	inter-protein xl	64	41	2417.33	605.34	4	-1.2	7	0.65	36.55		ADP-BeF
SEKSSR-CKDLK-a3-b2	TBP_fl	Mot1_fl	inter-protein xl	88	524	1450.71	363.684	4	-1.5	4	0	35.78		ADP-BeF
LYREIDEKGGK-KKSSSR-a8-b2	Mot1_fl	NC2alpha_fl	inter-protein xl	1036	62	2094.11	524.534	4	-1.1	3	0.78	35.4		ADP-BeF
ACEEEKKK-FKYSR-a6-b2	NC2beta_fl	Mot1_fl	inter-protein xl	62	1128	1815.88	454.978	4	-0.4	2	0.61	35.1		ADP-BeF
LFQNAKLQFER-MVKPK-a6-b3	NC2beta_fl	TBP_fl	inter-protein xl	130	157	2090.13	697.719	3	-1.1	3	0.52	35.1		ADP-BeF
NTLEEKVMNLQSFK-NSVVPKESK-a6-b6	Mot1_fl	NC2beta_fl	inter-protein xl	1217	33	2762.41	921.812	3	-1.1	4	0.18	35.07		ADP-BeF
EIDEKGGK-KSSSR-a5-b1	Mot1_fl	NC2alpha_fl	inter-protein xl	1036	62	1533.76	512.261	3	-1.6	16	0.52	34.92		ADP-BeF
LDLKNIALR-SEVKK-a4-b4	TBP_fl	Mot1_fl	inter-protein xl	41	864	1740.01	581.012	3	-2	2	0	34.9		ADP-BeF
NVGFKR-KSSSR-a5-b1	Mot1_fl	NC2alpha_fl	inter-protein xl	1060	62	1378.73	345.69	4	-1.9	3	0	34.58		ADP-BeF
LYREIDEKGGK-KSSSR-a8-b1	Mot1_fl	NC2alpha_fl	inter-protein xl	1036	62	1966.01	492.51	4	-0.8	7	0	34.56		ADP-BeF
ACEEEKK-SEVKK-a6-b4	NC2beta_fl	Mot1_fl	inter-protein xl	62	864	1577.76	526.927	3	-2.3	5	0.49	34.27		ADP-BeF
YAKIIHK-CKDLK-a3-b2	TBP_fl	Mot1_fl	inter-protein xl	99	524	1629.89	544.305	3	0	1	0	34.16		ADP-BeF
QESQKK-IDKFK-a5-b3	NC2alpha_fl	NC2beta_fl	inter-protein xl	8	107	1491.79	373.956	4	-0.1	1	0	33.95		ADP-BeF
AGSGEAIKR-SEKSSR-a8-b3	Mot1_fl	TBP_fl	inter-protein xl	138	88	1675.84	559.622	3	-3.4	2	0	33.26		ADP-BeF
NMEQFKNRE-SEKSSR-a6-b3	NC2alpha_fl	TBP_fl	inter-protein xl	92	88	1982.91	661.977	3	-2.3	2	0	33.22		ADP-BeF
CPISVKLR-KKSSSR-a6-b2	Mot1_fl	NC2alpha_fl	inter-protein xl	796	62	1758.98	587.333	3	-0.9	3	0	32.73		ADP-BeF
LEKFFTTLNTAQSK-NSVVPKESK-a3-b6	Mot1_fl	NC2beta_fl	inter-protein xl	6	33	2709.42	904.148	3	-0.5	2	0	32.45		ADP-BeF
KKTISYEHVYK-MVKPK-a2-b3	NC2beta_fl	TBP_fl	inter-protein xl	64	157	2092.14	524.042	4	-1.5	3	0.64	32.24		ADP-BeF
MVSSMLPKNSVVPK-LDLKNIALR-a8-b4	NC2beta_fl	TBP_fl	inter-protein xl	27	41	2666.48	667.628	4	-2.6	1	0	32.18		ADP-BeF
NMEQFKNRE-VDQKNVGFK-a6-b4	NC2alpha_fl	Mot1_fl	inter-protein xl	92	1055	2324.12	775.714	3	-0.8	3	0.73	32.12		ADP-BeF
SEKSSR-DIMKK-a3-b4	TBP_fl	Mot1_fl	inter-protein xl	88	1123	1421.72	474.913	3	-1.2	2	0.69	32.05		ADP-BeF
LDLKNIALR-DIMKK-a4-b4	TBP_fl	Mot1_fl	inter-protein xl	41	1123	1784.02	595.682	3	0.1	2	0	31.6		ADP-BeF
IIRDITVELGPVQEKLYR-KSSSR-a15-b1	Mot1_fl	NC2alpha_fl	inter-protein xl	1028	62	2800.54	561.116	5	-1	1	0.4	31.54		ADP-BeF
KKTISYEHVYK-LDLKNIALR-a2-b4	NC2beta_fl	TBP_fl	inter-protein xl	64	41	2545.43	637.364	4	-0.8	6	0.44	30.92		ADP-BeF
DIMKK-KSSSR-a4-b1	Mot1_fl	NC2alpha_fl	inter-protein xl	1123	62	1292.67	431.899	3	-2.1	2	0.42	30.91		ADP-BeF
GGKESLGDAELEYGK-KSSSR-a3-b1	Mot1_fl	NC2alpha_fl	inter-protein xl	1039	62	2211.07	553.774	4	-0.2	3	0.46	30.74		ADP-BeF
NSVVPKESK-NVGFKR-a6-b5	NC2beta_fl	Mot1_fl	inter-protein xl	33	1060	1801.96	601.663	3	-2.5	4	0	30.28		ADP-BeF
KKTISYEHVYK-NAEYNPKR-a2-b7	NC2beta_fl	TBP_fl	inter-protein xl	64	55	2481.26	621.323	4	-2.3	8	0.71	30.11		ADP-BeF
AGSGEAIKR-NMEQFKNRE-a8-b6	Mot1_fl	NC2alpha_fl	inter-protein xl	138	92	2178.05	727.023	3	-1.8	4	0	29.81		ADP-BeF
LDLKNIALR-ACEEEKKK-a4-b6	TBP_fl	NC2beta_fl	inter-protein xl	41	62	2171.16	724.729	3	0.4	1	0.68	29.8		ADP-BeF
GGKESLGDAELEYGKVDQK-KKSSSR-a3-b1	Mot1_fl	NC2alpha_fl	inter-protein xl	1039	61	2809.41	703.359	4	-1	1	0.94	29.72		ADP-BeF
KKSSSR-NVGFKR-a2-b5	NC2alpha_fl	Mot1_fl	inter-protein xl	62	1060	1506.82	503.283	3	-1.6	4	0.84	29.64		ADP-BeF
GGKESLGDAELEYGK-KKSSSR-a3-b1	Mot1_fl	NC2alpha_fl	inter-protein xl	1039	61	2339.16	585.797	4	-0.9	1	0.87	29.44		ADP-BeF
IREPKTTALIFASGK-NSVVPKESK-a5-b6	TBP_fl	NC2beta_fl	inter-protein xl	68	33	2713.5	679.384	4	1	3	0.23	29.44		ADP-BeF
CPISVKLR-SEKSSR-a6-b3	Mot1_fl	TBP_fl	inter-protein xl	796	88	1759.92	587.649	3	-0.8	1	0	29.21		ADP-BeF
ACEEEKKK-NVGFKR-a6-b5	NC2beta_fl	Mot1_fl	inter-protein xl	62	1060	1835.92	612.98	3	-1.3	2	0	28.91		ADP-BeF
AGSGEAIKR-MVKPK-a8-b3	Mot1_fl	TBP_fl	inter-protein xl	138	157	1584.86	529.295	3	-3.5	2	0	28.8		ADP-BeF
GGKESLGDAELEYGKVDQK-KSSSR-a3-b1	Mot1_fl	NC2alpha_fl	inter-protein xl	1039	62	2681.31	671.336	4	-0.6	6	0.4	28.3		ADP-BeF
ACEEEKKK-MVKPK-a6-b3	NC2beta_fl	TBP_fl	inter-protein xl	62	157	1717.87	430.476	4	-1.5	2	0.71	28.04		ADP-BeF
IMQLNEDIGKIGASVPVVASK-KKTISYEHVYK-a10-b2	NC2alpha_fl	NC2beta_fl	inter-protein xl	31	64	3658.97	732.802	5	1.2	5	0.56	28.02		ADP-BeF
EIDEKGGK-SEKSSR-a5-b3	Mot1_fl	TBP_fl	inter-protein xl	1036	88	1662.81	555.276	3	0	2	0	27.7		ADP-BeF
KTISYEHVYK-NAEYNPKR-a1-b7	NC2beta_fl	TBP_fl	inter-protein xl	64	55	2353.17	589.3	4	-0.2	5	0.74	27.04		ADP-BeF
RIMQLNEDIGKIGASVPVVASK-KKTISYEHVYK-a11-b2	NC2alpha_fl	NC2beta_fl	inter-protein xl	31	64	3815.05	954.771	4	-2.9	35	0.64	27		ADP-BeF
KSSSR-KYKFK-a1-b3	NC2alpha_fl	Mot1_fl	inter-protein xl	62	1126	1371.75	458.258	3	-1.3	2	0.77	26.58		ADP-BeF
IREPKTTALIFASGK-AGSGEAIKR-a5-b8	TBP_fl	Mot1_fl	inter-protein xl	68	138	2614.44	654.618	4	-1	2	0.38	26.54		ADP-BeF
NAEYNPKR-SEVKK-a7-b4	TBP_fl	Mot1_fl	inter-protein xl	55	864	1675.85	559.625	3	-0.8	1	0.46	26.52		ADP-BeF
ESLGDAELEYGKVDQK-KKSSSR-a12-b2	Mot1_fl	NC2alpha_fl	inter-protein xl	1051	62	2567.27	856.763	3	-1.9	2	0.91	25.98		ADP-BeF
EYGSLNVKMSDSEIEK-NAEYNPKR-a8-b7	Mot1_fl	TBP_fl	inter-protein xl	974	55	2914.36	729.598	4	-1.3	2	0.54	25.92		ADP-BeF
NAEYNPKR-KSSSR-a7-b1	TBP_fl	NC2alpha_fl	inter-protein xl	55	62	1649.81	413.46	4	-2.3	5	0.75	25.68		ADP-BeF
RIMQLNEDIGKIGASVPVVASK-KTISYEHVYK-a11-b1	NC2alpha_fl	NC2beta_fl	inter-protein xl	31	64	3686.96	922.748	4	-2.9	3	0.42	25.02		ADP-BeF
AGSGEAIKR-NAEYNPKR-a8-b7	Mot1_fl	TBP_fl	inter-protein xl	138	55	1973.99	494.506	4	-0.5	4	0	24.99		ADP-BeF
KKTISYEHVYK-NAEYNPKR-a1-b7	NC2beta_fl	TBP_fl	inter-protein xl	63	55	2481.26	414.551	6	-2.3	1	0.94	24.92		ADP-BeF
GHMNMEKNDDENTLPK-NMEQFKNRE-a7-b6	NC2beta_fl	NC2alpha_fl	inter-protein xl	5	92	3162.38	791.602	4	-1.4	1	0	24.46		ADP-BeF
MSDSEIEKTHK-SEKSSR-a8-b3	Mot1_fl	TBP_fl	inter-protein xl	982	88	2091.98	524.002	4	0.6	2	0.6	24.34		ADP-BeF
NKQTILYSR-MVKPK-a2-b3	Mot1_fl	TBP_fl	inter-protein xl	919	157	1819	607.341	3	-1.8	1	0	24.24		ADP-BeF
EYGSLNVKMSDSEIEK-NSVVPKESK-a8-b6	Mot1_fl	NC2beta_fl	inter-protein xl	974	33	2910.41	728.611	4	-1.1	2	0	23.78		ADP-BeF
DSGLTMEELHSQQIKLFQNAK-MVKPK-a15-b3	NC2beta_fl	TBP_fl	inter-protein xl	124	157	3113.59	779.405	4	0.4	1	0.52	23.56		ADP-BeF
IMQLNEDIGKIGASVPVVASK-NAEYNPKR-a10-b7	NC2alpha_fl	TBP_fl	inter-protein xl	31	55	3254.69	814.681	4	-1.6	1	0.3	23.24		ADP-BeF
IREPKTTALIFASGK-FFTTLNTAQSKVLK-a5-b11	TBP_fl	Mot1_fl	inter-protein xl	68	17	3323.85	665.777	5	-0.3	3	0.71	23.1		ADP-BeF
GGKESLGDAELEYGK-MVSSMLPKNSVVPK-a3-b8	Mot1_fl	NC2beta_fl	inter-protein xl	1039	27	3163.58	791.902	4	-0.8	1	0	22.59		ADP-BeF
ESLGDAELEYGKVDQK-MVSSMLPKNSVVPK-a12-b8	Mot1_fl	NC2beta_fl	inter-protein xl	1051	27	3391.69	848.93	4	-0.4	5	0.61	22.07		ADP-BeF
DLPPKIIR-LKIDVLK-a5-b2	Mot1_fl	Mot1_fl	intra-protein xl	1013	1003	1874.16	469.547	4	-1.4	5	0.85	40.53		ADP-BeF
LVTDFKIEYK-VDSKLFSK-a6-b4	Mot1_fl	Mot1_fl	intra-protein xl	78	196	2273.22	569.312	4	-1	10	0.49	40.5		ADP-BeF
CPISVKLR-DLPPKIIR-a6-b5	Mot1_fl	Mot1_fl	intra-protein xl	796	1013	2018.16	673.729	3	-3.1	16	0	40.03		ADP-BeF
IDVLKDLPPK-IGQKR-a5-b4	Mot1_fl	Mot1_fl	intra-protein xl	1008	1200	1833.07	459.274	4	-3.4	12	0	38.69		ADP-BeF
IDVLKDLPPK-CPISVKLR-a5-b6	Mot1_fl	Mot1_fl	intra-protein xl	1008	796	2204.26	552.072	4	-1.6	105	0	38.01		ADP-BeF
LKIDVLK-IGQKR-a2-b4	Mot1_fl	Mot1_fl	intra-protein xl	1003	1200	1523.93	508.986	3	-3.6	2	0.78	37.84		ADP-BeF
NKQTILYSR-VDQKNVGFK-a2-b4	Mot1_fl	Mot1_fl	intra-protein xl	919	1055	2251.2	563.807	4	-0.6	2	0.73	37.67		ADP-BeF
LKIDVLKDLPPK-IGQKR-a7-b4	Mot1_fl	Mot1_fl	intra-protein xl	1008	1200	2074.25	519.57	4	-1.1	10	0.71	37.55		ADP-BeF
YAKIIHK-SEKSSR-a3-b3	TBP_fl	TBP_fl	intra-protein xl	99	88	1659.89	415.981	4	-1.1	3	0	37.3		ADP-BeF
AGSGEAIKR-VDSKLFSK-a8-b4	Mot1_fl	Mot1_fl	intra-protein xl	138	196	1906.01	636.346	3	-1.5	3	0	37		ADP-BeF
LKIDVLKDLPPK-CPISVKLR-a7-b6	Mot1_fl	Mot1_fl	intra-protein xl	1008	796	2445.44	612.367	4	-1.3	21	0	36.64		ADP-BeF
RLKIDVLK-IGQKR-a3-b4	Mot1_fl	Mot1_fl	intra-protein xl	1003	1200	1680.04	337.015	5	-3.1	2	0.84	36.63		ADP-BeF
EASSKVLSK-KVLPFILR-a5-b1	Mot1_fl	Mot1_fl	intra-protein xl	743	993	2028.19	508.057	4	-1.7	7	0.58	36.58		ADP-BeF
CPISVKLR-IGQKR-a6-b4	Mot1_fl	Mot1_fl	intra-protein xl	796	1200	1667.95	417.995	4	-1.3	2	0	36.42		ADP-BeF
IGQKR-SEVKK-a4-b4	Mot1_fl	Mot1_fl	intra-protein xl	1200	864	1285.73	429.586	3	-1.4	1	0	36.38		ADP-BeF
GGKESLGDAELEYGK-SEVKK-a3-b4	Mot1_fl	Mot1_fl	intra-protein xl	1039	864	2237.11	560.284	4	-0.1	4	0.54	34.94		ADP-BeF
IVLTGAKVR-MVKPK-a7-b3	TBP_fl	TBP_fl	intra-protein xl	176	157	1653	552.008	3	-1.2	4	0	34.91		ADP-BeF
LDLKNIALR-SEKSSR-a4-b3	TBP_fl	TBP_fl	intra-protein xl	41	88	1843.02	461.762	4	-0.1	1	0	34.84		ADP-BeF
LYREIDEKGGK-NVGFKR-a8-b5	Mot1_fl	Mot1_fl	intra-protein xl	1036	1060	2122.12	708.382	3	2.2	6	0	34.75		ADP-BeF
SEKSSR-MVKPK-a3-b3	TBP_fl	TBP_fl	intra-protein xl	88	157	1389.72	464.249	3	-3.2	3	0	34.6		ADP-BeF
GGKESLGDAELEYGK-NVGFKR-a3-b5	Mot1_fl	Mot1_fl	intra-protein xl	1039	1060	2367.17	592.8	4	-1.2	6	0.54	34.37		ADP-BeF
GGKESLGDAELEYGK-VDQKNVGFK-a3-b4	Mot1_fl	Mot1_fl	intra-protein xl	1039	1055	2681.32	894.78	3	-1.1	7	0.49	34.37		ADP-BeF
YAKIIHK-MVKPK-a3-b3	TBP_fl	TBP_fl	intra-protein xl	99	157	1568.91	393.234	4	-3.1	2	0.44	34.25		ADP-BeF
NISGNIDREASSKVLSK-KVLPFILR-a13-b1	Mot1_fl	Mot1_fl	intra-protein xl	743	993	2897.63	725.416	4	-0.2	7	0	34.23		ADP-BeF
LFSKIYEILVTDK-AGSGEAIKR-a4-b8	Mot1_fl	Mot1_fl	intra-protein xl	200	138	2551.39	638.855	4	-1.1	2	0.61	34.21		ADP-BeF
CPISVKLR-SEVKK-a6-b4	Mot1_fl	Mot1_fl	intra-protein xl	796	864	1656.92	553.314	3	-2.8	1	0.69	33.92		ADP-BeF
LDLKNIALR-NAEYNPKR-a4-b7	TBP_fl	TBP_fl	intra-protein xl	41	55	2141.16	536.297	4	-1.4	8	0.77	33.37		ADP-BeF
KFFPFVAAEIYKR-IGQKR-a1-b4	Mot1_fl	Mot1_fl	intra-protein xl	865	1200	2311.28	578.828	4	-2.1	2	0.29	33.36		ADP-BeF
KSLESLLDAGK-KVLPFILR-a1-b1	Mot1_fl	Mot1_fl	intra-protein xl	773	993	2240.31	561.084	4	-3.8	1	0.67	32.99		ADP-BeF
AGSGEAIKR-IGQKR-a8-b4	Mot1_fl	Mot1_fl	intra-protein xl	138	1200	1583.87	528.965	3	-0.9	1	0	32.8		ADP-BeF
IDKFK-QKPSK-a3-b2	NC2beta_fl	NC2beta_fl	intra-protein xl	107	101	1331.74	444.922	3	-2.4	13	0.45	32.71		ADP-BeF
AGSGEAIKR-VDQKNVGFK-a8-b4	Mot1_fl	Mot1_fl	intra-protein xl	138	1055	2017.06	505.273	4	0.4	2	0	32.48		ADP-BeF
KFFPFVAAEIYK-CPISVKLR-a1-b6	Mot1_fl	Mot1_fl	intra-protein xl	865	796	2526.37	632.599	4	-2	3	0.5	32.36		ADP-BeF
VDQKNVGFKR-NKQTILYSR-a4-b2	Mot1_fl	Mot1_fl	intra-protein xl	1055	919	2407.29	602.831	4	-2	6	0.51	32.05		ADP-BeF
GGKESLGDAELEYGK-NTLEEKVMNLQSFK-a3-b6	Mot1_fl	Mot1_fl	intra-protein xl	1039	1217	3327.62	1110.21	3	-0.7	2	0.55	32.05		ADP-BeF
SLESLLDAGKIPEYHIK-CPISVKLR-a10-b6	Mot1_fl	Mot1_fl	intra-protein xl	783	796	2979.61	745.911	4	0.2	2	0.41	32.04		ADP-BeF
AGSGEAIKR-FKYSR-a8-b2	Mot1_fl	Mot1_fl	intra-protein xl	138	1128	1682.87	421.724	4	-4.7	1	0.63	31.55		ADP-BeF
NDDENTLPKATVDK-NSVVPKESK-a9-b6	NC2beta_fl	NC2beta_fl	intra-protein xl	14	33	2641.3	661.334	4	-1.4	7	0.57	31.52		ADP-BeF
FKDSGLTMEELHSQQIK-KKTISYEHVYK-a2-b2	NC2beta_fl	NC2beta_fl	intra-protein xl	109	64	3480.75	697.158	5	-3.2	3	0.68	31.48		ADP-BeF
KKTISYEHVYK-LFQNAKLQFER-a2-b6	NC2beta_fl	NC2beta_fl	intra-protein xl	64	130	2883.53	577.713	5	-1.1	1	0.72	31.36		ADP-BeF
NKQTILYSR-SEVKK-a2-b4	Mot1_fl	Mot1_fl	intra-protein xl	919	864	1806.98	603.335	3	-1	3	0	31.25		ADP-BeF
NMEQFKNRE-KSSSR-a6-b1	NC2alpha_fl	NC2alpha_fl	intra-protein xl	92	62	1853.87	618.964	3	-0.9	2	0.78	31.16		ADP-BeF
KKLSAPGIR-MAPLKEFK-a2-b5	Mot1_fl	Mot1_fl	intra-protein xl	537	532	2027.16	507.797	4	-1.5	1	0.98	31		ADP-BeF
KKTISYEHVYK-IDKFK-a2-b3	NC2beta_fl	NC2beta_fl	intra-protein xl	64	107	2140.15	429.038	5	-2.2	2	0.83	30.75		ADP-BeF
DIMKK-FKYSR-a4-b2	Mot1_fl	Mot1_fl	intra-protein xl	1123	1128	1428.74	477.254	3	-4.2	2	0	30.39		ADP-BeF
GGKESLGDAELEYGK-VDQKNVGFKR-a3-b4	Mot1_fl	Mot1_fl	intra-protein xl	1039	1055	2837.41	710.362	4	-1.7	3	0.39	30.2		ADP-BeF
IREPKTTALIFASGK-SEKSSR-a5-b3	TBP_fl	TBP_fl	intra-protein xl	68	88	2419.31	605.835	4	0.3	1	0.26	30.03		ADP-BeF
NKQTILYSR-NVGFKR-a2-b5	Mot1_fl	Mot1_fl	intra-protein xl	919	1060	1937.04	646.689	3	-2.4	2	0.52	29.53		ADP-BeF
NTLEEKVMNLQSFK-NVGFKR-a6-b5	Mot1_fl	Mot1_fl	intra-protein xl	1217	1060	2495.28	832.767	3	-3.1	1	0.32	29.47		ADP-BeF
VKALEDIISLCGGEDLGSK-NKQTILYSR-a2-b2	Mot1_fl	Mot1_fl	intra-protein xl	1086	919	3220.66	806.173	4	-0.8	2	0.81	29.3		ADP-BeF
GHMNMEKNDDENTLPK-NSVVPKESK-a7-b6	NC2beta_fl	NC2beta_fl	intra-protein xl	5	33	2954.37	739.601	4	-0.7	4	0	29.24		ADP-BeF
KLTRFPISR-QESQKK-a1-b5	NC2alpha_fl	NC2alpha_fl	intra-protein xl	10	8	1959.09	392.825	5	-2.4	5	0.69	29.08		ADP-BeF
AGSGEAIKR-NKQTILYSR-a8-b2	Mot1_fl	Mot1_fl	intra-protein xl	138	919	2105.12	702.715	3	-0.6	2	0.41	28.27		ADP-BeF
EIDEKGGKESLGDAELEYGK-NVGFKR-a5-b5	Mot1_fl	Mot1_fl	intra-protein xl	1036	1060	2981.47	597.302	5	3.4	5	0.44	28.15		ADP-BeF
KKTISYEHVYK-LFQNAKLQFER-a1-b6	NC2beta_fl	NC2beta_fl	intra-protein xl	63	130	2883.53	577.713	5	-0.6	1	0.56	28.01		ADP-BeF
ESLGDAELEYGKVDQK-NKQTILYSR-a12-b2	Mot1_fl	Mot1_fl	intra-protein xl	1051	919	2997.49	750.38	4	-1.1	3	0	27.92		ADP-BeF
IAKLEHVEANFLSDIDFK-AGSGEAIKR-a3-b8	Mot1_fl	Mot1_fl	intra-protein xl	115	138	3071.59	768.906	4	0.1	1	0.37	27.75		ADP-BeF
VDQKNVGFK-EIDEKGGK-a4-b5	Mot1_fl	Mot1_fl	intra-protein xl	1055	1036	2004.01	669.013	3	-1	2	0	27.72		ADP-BeF
ESLGDAELEYGKVDQK-NVGFKR-a12-b5	Mot1_fl	Mot1_fl	intra-protein xl	1051	1060	2595.28	649.827	4	-2.4	5	0.43	27.6		ADP-BeF
TRDLFLAVSHIGHFKDSTEVSCK-EIDEKGGK-a15-b5	Mot1_fl	Mot1_fl	intra-protein xl	1076	1036	3616.78	724.364	5	-0.6	4	0.36	26.68		ADP-BeF
KKLSAPGIR-MAPLKEFK-a1-b5	Mot1_fl	Mot1_fl	intra-protein xl	536	532	2027.16	507.798	4	0.3	1	0.99	26.64		ADP-BeF
DLFLAVSHIGHFKDSTEVSCK-EIDEKGGK-a13-b5	Mot1_fl	Mot1_fl	intra-protein xl	1076	1036	3359.64	840.917	4	0.5	5	0	26.37		ADP-BeF
AGSGEAIKR-NVGFKR-a8-b5	Mot1_fl	Mot1_fl	intra-protein xl	138	1060	1702.9	568.643	3	-4	2	0.59	25.79		ADP-BeF
VLSKVIPTLGFSTNTK-KVLPFILR-a4-b1	Mot1_fl	Mot1_fl	intra-protein xl	747	993	2784.65	697.17	4	-1.2	2	0.89	25.64		ADP-BeF
MSDSEIEKTHK-NKQTILYSR-a8-b2	Mot1_fl	Mot1_fl	intra-protein xl	982	919	2521.24	841.423	3	-1.4	3	0.68	25.24		ADP-BeF
EYGSLNVKMSDSEIEK-KVLPFILR-a8-b1	Mot1_fl	Mot1_fl	intra-protein xl	974	993	2908.52	728.138	4	-1.4	2	0.64	23.66		ADP-BeF
ESLGDAELEYGKVDQK-LYREIDEKGGK-a12-b8	Mot1_fl	Mot1_fl	intra-protein xl	1051	1036	3182.56	796.649	4	0.7	2	0.43	22.21		ADP-BeF
EYGSLNVKMSDSEIEK-NKQTILYSR-a8-b2	Mot1_fl	Mot1_fl	intra-protein xl	974	919	3045.5	762.382	4	-0.2	2	0	22.09		ADP-BeF
RLKIDVLK-KIGQR-a3-b1	Mot1_fl	decoy_reverse_Mot1_fl	decoy intra-protein xl	1003	57	1680.04	337.015	5	-1.8	5	0	32.88	x	ADP-BeF
EASSKVLSK-RLVLPIFKR-a5-b8	Mot1_fl	decoy_reverse_Mot1_fl	decoy intra-protein xl	743	264	2184.3	547.083	4	-0.1	4	0.87	28.61	x	ADP-BeF
NMEQFKNRE-NVGFKR-a6-b5	NC2alpha_fl	Mot1_fl	inter-protein xl	92	1060	2009.98	671	3	1.3	2	0	39.83		ADP
AGSGEAIKR-LDLKNIALR-a8-b4	Mot1_fl	TBP_fl	inter-protein xl	138	41	2038.15	510.547	4	0.6	8	0	39.5		ADP
NSVVPKESK-MVKPK-a6-b3	NC2beta_fl	TBP_fl	inter-protein xl	33	157	1683.92	562.316	3	0.8	2	0	38.65		ADP
MVSSMLPKNSVVPK-MVKPK-a8-b3	NC2beta_fl	TBP_fl	inter-protein xl	27	157	2213.2	554.308	4	0.6	4	0.41	36.85		ADP
GGKESLGDAELEYGK-SEKSSR-a3-b3	Mot1_fl	TBP_fl	inter-protein xl	1039	88	2340.11	586.035	4	0.5	1	0.53	36.71		ADP
SSSKKR-MVKPK-a4-b3	decoy_reverse_NC2alpha_fl	TBP_fl	decoy inter-protein xl	34	157	1388.78	348.203	4	-0.5	2	0.86	36.43	x	ADP
KTISYEHVYK-LDLKNIALR-a1-b4	NC2beta_fl	TBP_fl	inter-protein xl	64	41	2417.34	605.342	4	1.6	7	0.68	36.39		ADP
NVGFKR-KSSSR-a5-b1	Mot1_fl	NC2alpha_fl	inter-protein xl	1060	62	1378.73	345.691	4	0.3	3	0	35.54		ADP
LDLKNIALR-SEVKK-a4-b4	TBP_fl	Mot1_fl	inter-protein xl	41	864	1740.01	581.012	3	-0.6	3	0	35.46		ADP
NMEQFKNRE-SEKSSR-a6-b3	NC2alpha_fl	TBP_fl	inter-protein xl	92	88	1982.91	661.979	3	0.3	3	0	35.33		ADP
KKTISYEHVYK-LDLKNIALR-a2-b4	NC2beta_fl	TBP_fl	inter-protein xl	64	41	2545.43	849.485	3	1.5	9	0.54	34.86		ADP
NSVVPKESK-SEKSSR-a6-b3	NC2beta_fl	TBP_fl	inter-protein xl	33	88	1774.91	592.643	3	0.4	3	0	34.35		ADP
NMEQFKNRE-VDQKNVGFK-a6-b4	NC2alpha_fl	Mot1_fl	inter-protein xl	92	1055	2324.12	582.037	4	-2.1	2	0.83	34.32		ADP
NAEYNPKR-SEVKK-a7-b4	TBP_fl	Mot1_fl	inter-protein xl	55	864	1675.86	559.627	3	3.2	3	0.72	34.12		ADP
AGSGEAIKR-NMEQFKNRE-a8-b6	Mot1_fl	NC2alpha_fl	inter-protein xl	138	92	2178.05	727.024	3	0.2	4	0	33.8		ADP
SEKSSR-CKDLK-a3-b2	TBP_fl	Mot1_fl	inter-protein xl	88	524	1450.71	363.685	4	0.2	4	0	33.5		ADP
AGSGEAIKR-NAEYNPKR-a8-b7	Mot1_fl	TBP_fl	inter-protein xl	138	55	1973.99	659.006	3	1.5	8	0.68	33.45		ADP
GGKESLGDAELEYGK-KSSSR-a3-b1	Mot1_fl	NC2alpha_fl	inter-protein xl	1039	62	2211.07	553.774	4	0.2	4	0.4	33.3		ADP
KKSSSR-NVGFKR-a2-b5	NC2alpha_fl	Mot1_fl	inter-protein xl	62	1060	1506.83	503.284	3	0.5	3	0.73	33.07		ADP
ACEEEKKK-SEVKK-a6-b4	NC2beta_fl	Mot1_fl	inter-protein xl	62	864	1705.86	569.626	3	-0.7	5	0.87	32.55		ADP
AGSGEAIKR-ACEEEKKK-a8-b6	Mot1_fl	NC2beta_fl	inter-protein xl	138	62	2003.99	669.005	3	-0.9	2	0	32.27		ADP
AGSGEAIKR-SEKSSR-a8-b3	Mot1_fl	TBP_fl	inter-protein xl	138	88	1675.85	559.625	3	0.7	4	0.53	31.93		ADP
IREPKTTALIFASGK-KSSSR-a5-b1	TBP_fl	NC2alpha_fl	inter-protein xl	68	62	2290.27	573.575	4	1.4	2	0.27	31.87		ADP
KKTISYEHVYK-NAEYNPKR-a2-b7	NC2beta_fl	TBP_fl	inter-protein xl	64	55	2481.27	828.098	3	2.2	9	0.9	31.75		ADP
EIDEKGGK-KSSSR-a5-b1	Mot1_fl	NC2alpha_fl	inter-protein xl	1036	62	1533.76	512.262	3	0.2	4	0.51	31.55		ADP
LYREIDEKGGK-KSSSR-a8-b1	Mot1_fl	NC2alpha_fl	inter-protein xl	1036	62	1966.01	492.511	4	-0.4	5	0.55	31.2		ADP
GGKESLGDAELEYGKVDQK-KSSSR-a3-b1	Mot1_fl	NC2alpha_fl	inter-protein xl	1039	62	2681.31	671.335	4	-2.2	2	0.48	31.13		ADP
NAEYNPKR-FKYSR-a7-b2	TBP_fl	Mot1_fl	inter-protein xl	55	1128	1785.88	596.301	3	0.4	3	0.85	31.12		ADP
DIMKK-KSSSR-a4-b1	Mot1_fl	NC2alpha_fl	inter-protein xl	1123	62	1292.68	431.9	3	0.4	2	0.75	31.06		ADP
LEKFFTTLNTAQSK-NSVVPKESK-a3-b6	Mot1_fl	NC2beta_fl	inter-protein xl	6	33	2709.43	904.149	3	0.8	3	0.14	30.98		ADP
ACEEEKKK-MVKPK-a6-b3	NC2beta_fl	TBP_fl	inter-protein xl	62	157	1717.87	573.632	3	-0.7	3	0.59	30.93		ADP
KKTISYEHVYK-LDLKNIALR-a1-b4	NC2beta_fl	TBP_fl	inter-protein xl	63	41	2545.43	510.093	5	-0.7	2	0.6	30.89		ADP
ATVDKMVSSMLPK-KLTRFPISR-a5-b1	NC2beta_fl	NC2alpha_fl	inter-protein xl	19	10	2618.42	655.614	4	-2.1	2	0.23	30.78		ADP
AGSGEAIKR-KSSSR-a8-b1	Mot1_fl	NC2alpha_fl	inter-protein xl	138	62	1546.81	516.61	3	0.8	5	0	30.56		ADP
IREPKTTALIFASGK-FFTTLNTAQSKVLK-a5-b11	TBP_fl	Mot1_fl	inter-protein xl	68	17	3323.86	665.779	5	1.7	8	0.23	30.46		ADP
AGSGEAIKR-ACEEEKK-a8-b6	Mot1_fl	NC2beta_fl	inter-protein xl	138	62	1875.9	626.308	3	0.7	1	0	30.03		ADP
GGKESLGDAELEYGKVDQK-SEKSSR-a3-b3	Mot1_fl	TBP_fl	inter-protein xl	1039	88	2810.36	703.597	4	0.6	3	0.52	28.98		ADP
KTISYEHVYK-NAEYNPKR-a1-b7	NC2beta_fl	TBP_fl	inter-protein xl	64	55	2353.17	785.399	3	0.7	6	0.69	28.89		ADP
LFQNAKLQFER-MVKPK-a6-b3	NC2beta_fl	TBP_fl	inter-protein xl	130	157	2090.13	523.541	4	-0.4	1	0	28.83		ADP
ACEEEKKK-MVKPK-a7-b3	NC2beta_fl	TBP_fl	inter-protein xl	63	157	1717.87	573.633	3	0.1	2	0.58	28.39		ADP
ACEEEKK-SEKSSR-a6-b3	NC2beta_fl	TBP_fl	inter-protein xl	62	88	1680.77	561.263	3	1.7	1	0.67	28.05		ADP
SEKSSR-DIMKK-a3-b4	TBP_fl	Mot1_fl	inter-protein xl	88	1123	1421.72	474.914	3	0.1	1	0.7	27.35		ADP
KTISYEHVYK-EANKYNPR-a1-b4	NC2beta_fl	decoy_reverse_TBP_fl	decoy inter-protein xl	64	147	2353.17	471.642	5	-0.2	1	0.89	26.93	x	ADP
KKSSSR-DIMKK-a2-b4	NC2alpha_fl	Mot1_fl	inter-protein xl	62	1123	1420.77	474.598	3	-0.5	2	0.88	26		ADP
KKTISYEHVYK-AGSGEAIKR-a2-b8	NC2beta_fl	Mot1_fl	inter-protein xl	64	138	2378.26	595.573	4	0.7	1	0.79	25.23		ADP
ACEEEKKK-NAEYNPKR-a7-b7	NC2beta_fl	TBP_fl	inter-protein xl	63	55	2107	703.342	3	0.9	1	0.82	23.69		ADP
IVLTGAKVR-MVKPK-a7-b3	TBP_fl	TBP_fl	intra-protein xl	176	157	1653	552.009	3	1	2	0	42.9		ADP
AGSGEAIKR-VDQKNVGFK-a8-b4	Mot1_fl	Mot1_fl	intra-protein xl	138	1055	2017.06	673.361	3	0	3	0	40.83		ADP
RLKIDVLK-IGQKR-a3-b4	Mot1_fl	Mot1_fl	intra-protein xl	1003	1200	1680.04	421.018	4	0.8	4	0.65	40.69		ADP
LKIDVLKDLPPK-IGQKR-a7-b4	Mot1_fl	Mot1_fl	intra-protein xl	1008	1200	2074.25	519.571	4	0.6	27	0.7	39.31		ADP
IREPKTTALIFASGK-MVKPK-a5-b3	TBP_fl	TBP_fl	intra-protein xl	68	157	2328.33	583.09	4	1.5	4	0.29	39.03		ADP
YAKIIHK-MVKPK-a3-b3	TBP_fl	TBP_fl	intra-protein xl	99	157	1568.91	393.235	4	-0.3	2	0.59	38.81		ADP
IGQKR-SEVKK-a4-b4	Mot1_fl	Mot1_fl	intra-protein xl	1200	864	1285.74	429.586	3	0.2	2	0	38.31		ADP
AGSGEAIKR-VDSKLFSK-a8-b4	Mot1_fl	Mot1_fl	intra-protein xl	138	196	1906.01	636.346	3	-0.9	4	0	38.13		ADP
YAKIIHK-SEKSSR-a3-b3	TBP_fl	TBP_fl	intra-protein xl	99	88	1659.89	415.981	4	0.1	4	0	37.89		ADP
KTISYEHVYK-ACEEEKK-a1-b6	NC2beta_fl	NC2beta_fl	intra-protein xl	64	62	2255.08	564.779	4	2.4	15	0.45	37.5		ADP
SEKSSR-MVKPK-a3-b3	TBP_fl	TBP_fl	intra-protein xl	88	157	1389.73	348.44	4	-0.4	4	0	37.49		ADP
LVTDFKIEYK-VDSKLFSK-a6-b4	Mot1_fl	Mot1_fl	intra-protein xl	78	196	2273.22	569.313	4	0.9	15	0.21	37.17		ADP
CPISVKLR-DLPPKIIR-a6-b5	Mot1_fl	Mot1_fl	intra-protein xl	796	1013	2018.17	673.731	3	-0.5	20	0	36.91		ADP
GGKESLGDAELEYGK-VDQKNVGFK-a3-b4	Mot1_fl	Mot1_fl	intra-protein xl	1039	1055	2681.32	671.337	4	-0.7	5	0.52	36.7		ADP
EASSKVLSK-KVLPFILR-a5-b1	Mot1_fl	Mot1_fl	intra-protein xl	743	993	2028.2	508.057	4	-0.2	6	0	36.52		ADP
IREPKTTALIFASGK-SEKSSR-a5-b3	TBP_fl	TBP_fl	intra-protein xl	68	88	2419.31	605.836	4	1.6	2	0.23	36.51		ADP
CPISVKLR-SEVKK-a6-b4	Mot1_fl	Mot1_fl	intra-protein xl	796	864	1656.92	553.315	3	-0.3	2	0	36.11		ADP
IREPKTTALIFASGK-LDLKNIALR-a5-b4	TBP_fl	TBP_fl	intra-protein xl	68	41	2781.62	696.412	4	2.5	2	0	36.05		ADP
NDDENTLPKATVDK-NSVVPKESK-a9-b6	NC2beta_fl	NC2beta_fl	intra-protein xl	14	33	2641.31	881.443	3	-0.5	8	0.5	36		ADP
LYREIDEKGGK-NVGFKR-a8-b5	Mot1_fl	Mot1_fl	intra-protein xl	1036	1060	2122.12	425.432	5	1.4	10	0	35.74		ADP
GGKESLGDAELEYGK-NVGFKR-a3-b5	Mot1_fl	Mot1_fl	intra-protein xl	1039	1060	2367.17	790.065	3	0.6	8	0	35.67		ADP
GGKESLGDAELEYGK-SEVKK-a3-b4	Mot1_fl	Mot1_fl	intra-protein xl	1039	864	2237.1	560.284	4	-0.8	9	0.41	35.31		ADP
IREPKTTALIFASGK-MVITGAKSEK-a5-b7	TBP_fl	TBP_fl	intra-protein xl	68	85	2789.54	698.392	4	0.4	12	0.31	35.08		ADP
LDLKNIALR-NAEYNPKR-a4-b7	TBP_fl	TBP_fl	intra-protein xl	41	55	2141.16	536.298	4	0.8	6	0.9	35.01		ADP
GGKESLGDAELEYGK-NVGFKRTR-a3-b5	Mot1_fl	Mot1_fl	intra-protein xl	1039	1060	2624.32	657.087	4	-1.2	3	0.53	34.24		ADP
LFSKIYEILVTDK-AGSGEAIKR-a4-b8	Mot1_fl	Mot1_fl	intra-protein xl	200	138	2551.39	638.856	4	0.9	3	0.6	33.92		ADP
LDLKNIALR-MVKPK-a4-b3	TBP_fl	TBP_fl	intra-protein xl	41	157	1752.03	585.019	3	-0.1	2	0	33.89		ADP
NISGNIDREASSKVLSK-KVLPFILR-a13-b1	Mot1_fl	Mot1_fl	intra-protein xl	743	993	2897.63	725.416	4	-0.4	12	0	33.79		ADP
DLPPKIIR-RLKIDVLK-a5-b3	Mot1_fl	Mot1_fl	intra-protein xl	1013	1003	2030.27	677.763	3	1.5	3	0	33.25		ADP
LKIDVLK-SEVKK-a2-b4	Mot1_fl	Mot1_fl	intra-protein xl	1003	864	1512.91	505.312	3	-0.3	1	0.7	32.67		ADP
AGSGEAIKR-NVGFKR-a8-b5	Mot1_fl	Mot1_fl	intra-protein xl	138	1060	1702.91	568.645	3	0.6	5	0	32.59		ADP
KKTISYEHVYK-LFQNAKLQFER-a2-b6	NC2beta_fl	NC2beta_fl	intra-protein xl	64	130	2883.53	721.891	4	1.2	3	0.78	32.45		ADP
IDVLKDLPPK-CPISVKLR-a5-b6	Mot1_fl	Mot1_fl	intra-protein xl	1008	796	2204.26	735.762	3	1.6	6	0	32.21		ADP
NMEQFKNRE-KSSSR-a6-b1	NC2alpha_fl	NC2alpha_fl	intra-protein xl	92	62	1853.87	618.964	3	0.4	2	0.81	31.96		ADP
VLSKVIPTLGFSTNTK-KVLPFILR-a4-b1	Mot1_fl	Mot1_fl	intra-protein xl	747	993	2784.65	929.225	3	0.1	7	0	31.15		ADP
NKQTILYSR-CPISVKLR-a2-b6	Mot1_fl	Mot1_fl	intra-protein xl	919	796	2189.19	730.738	3	-3.5	1	0	29.65		ADP
LKIDVLKDLPPK-CPISVKLR-a7-b6	Mot1_fl	Mot1_fl	intra-protein xl	1008	796	2445.44	612.368	4	0.3	3	0	29.39		ADP
VKALEDIISLCGGEDLGSK-NKQTILYSR-a2-b2	Mot1_fl	Mot1_fl	intra-protein xl	1086	919	3220.67	1074.56	3	1.1	2	0	29.35		ADP
KLVSLLSSPDEDIK-EFVEDKDGLCR-a1-b6	Mot1_fl	Mot1_fl	intra-protein xl	281	275	3005.49	1002.84	3	1.7	3	0.21	28.76		ADP
TRDLFLAVSHIGHFKDSTEVSCK-EIDEKGGK-a15-b5	Mot1_fl	Mot1_fl	intra-protein xl	1076	1036	3616.79	724.366	5	2.5	4	0.43	28.33		ADP
VDQKNVGFKR-AGSGEAIKR-a4-b8	Mot1_fl	Mot1_fl	intra-protein xl	1055	138	2173.16	435.64	5	0.8	5	0.92	28.04		ADP
DSTEVSCKVK-AGSGEAIKR-a8-b8	Mot1_fl	Mot1_fl	intra-protein xl	1084	138	2135.05	712.693	3	0.7	2	0	27.97		ADP
ESLGDAELEYGKVDQK-NVGFKR-a12-b5	Mot1_fl	Mot1_fl	intra-protein xl	1051	1060	2595.28	649.829	4	1.1	4	0.43	27.5		ADP
AGSGEAIKR-SEVKK-a8-b4	Mot1_fl	Mot1_fl	intra-protein xl	138	864	1572.85	525.291	3	1	1	0.81	26.89		ADP
GGKESLGDAELEYGK-NTLEEKVMNLQSFK-a3-b6	Mot1_fl	Mot1_fl	intra-protein xl	1039	1217	3327.62	1110.21	3	1	2	0.59	26.76		ADP
GGKESLGDAELEYGKVDQK-NVGFKR-a3-b5	Mot1_fl	Mot1_fl	intra-protein xl	1039	1060	2837.43	710.364	4	1.8	6	0.58	26.42		ADP
NKQTILYSR-LKIDVLK-a2-b2	Mot1_fl	Mot1_fl	intra-protein xl	919	1003	2045.19	682.737	3	-0.6	1	0	26.15		ADP
KTISYEHVYK-ACEEEKKK-a1-b6	NC2beta_fl	NC2beta_fl	intra-protein xl	64	62	2383.18	477.643	5	1	1	0.99	26.04		ADP
KKTISYEHVYK-ACEEEKKK-a2-b6	NC2beta_fl	NC2beta_fl	intra-protein xl	64	62	2511.27	628.826	4	1.2	1	0.96	25.05		ADP
NAEYNPKR-SEKSSR-a7-b3	TBP_fl	TBP_fl	intra-protein xl	55	88	1778.85	445.721	4	-1.2	1	0.96	24.65		ADP
IREPKTTALIFASGK-NAEYNPKR-a5-b7	TBP_fl	TBP_fl	intra-protein xl	68	55	2717.45	680.371	4	0.7	1	0.73	24.58		ADP
LFQNAKLQFER-QKPSKIDK-a6-b2	NC2beta_fl	NC2beta_fl	intra-protein xl	130	101	2431.32	608.839	4	1.2	2	0.74	23.54		ADP
FFTTLNTAQSKVLK-NKQTILYSR-a11-b2	Mot1_fl	Mot1_fl	intra-protein xl	17	919	2814.52	704.639	4	-1.3	1	0.74	22.68		ADP

## Sheet: ReadMe
Headers	Definition
Id	seq1-seq2-pos1-pos2
Protein1	Name of Protein 1
Protein2	Name of Protein 2
XLType	intra-protein xl, inter-protein xl or decoy inter-protein xl
AbsPos1	Position of the linked Lys within the Protein Sequence 1
AbsPos2	Position of the linked Lys within the Protein Sequence 2
Mr	relative mass of the detected Xlink species
Mz	m/z value of the detected Xlink species
z	charge of the detected Xlink species
Error_rel.ppm.	relative error of the mass [ppm]
nseen	how often results the xQUEST search in exactly this Xlink species
Δ Score	Score for the reliability of this Xlink species
ld.Score	Main Score for ranking Xlinked Species
Decoy	"x" for a decoy hit
Experiment	Experiment Name
