# Supplementary figures and images for: Structural basis for recognition and remodeling of the TBP:DNA:NC2 complex by Mot1
Source: eLife journal article supplement (doi:10.7554/elife.07432), 2015-08-10

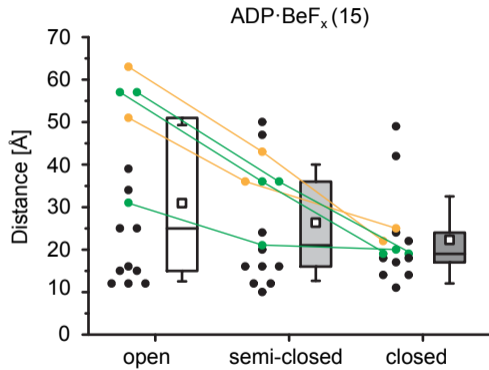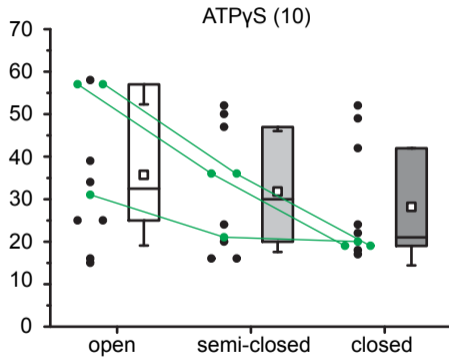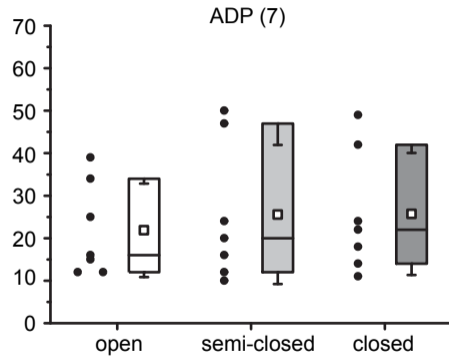

Supplement: supp [file elife-07432-supp-v1.zip › elife_poa_e07432_Figure_6_figure_supplement_2.pdf]

A

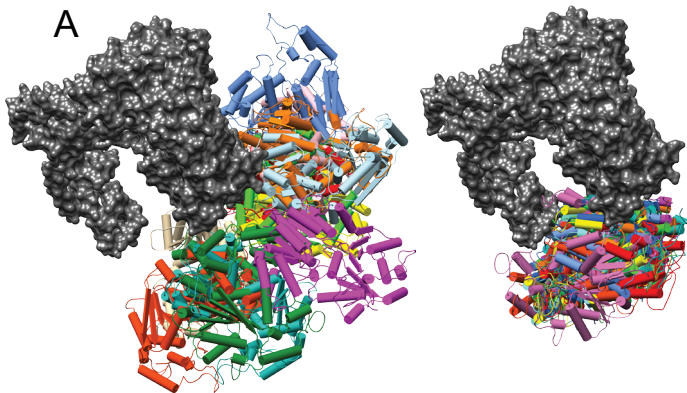

B

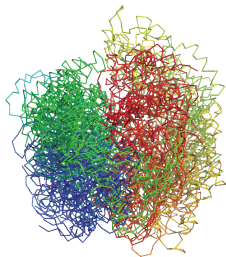

Supplement: supp [file elife-07432-supp-v1.zip › elife_poa_e07432_Figure_7_figure_supplement_2.pdf]

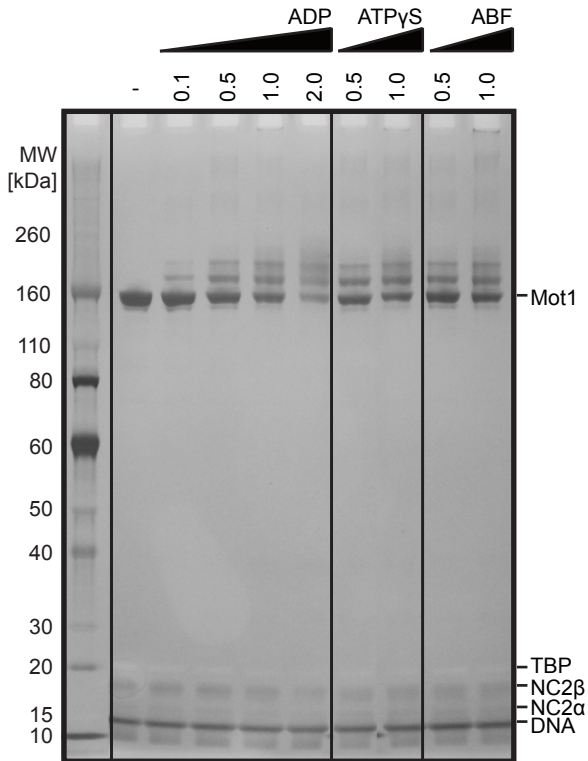

Supplement: supp [file elife-07432-supp-v1.zip › elife_poa_e07432_Figure_6_figure_supplement_1.pdf]

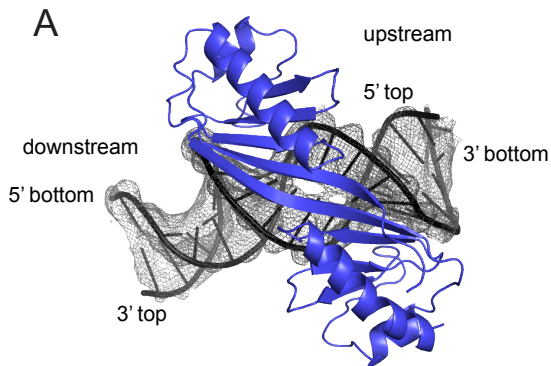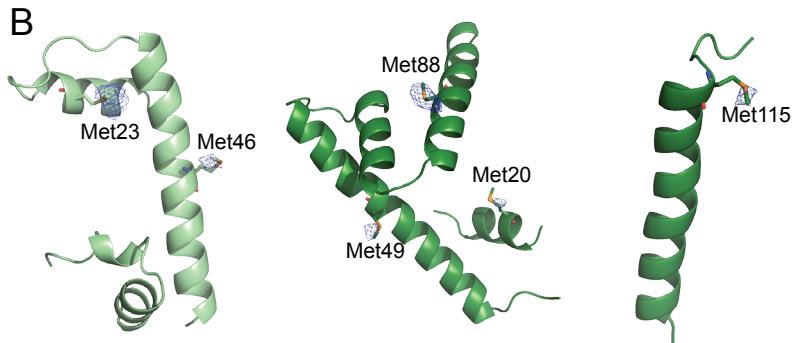

Supplement: supp [file elife-07432-supp-v1.zip › elife_poa_e07432_Figure_4_figure_supplement_1.pdf]

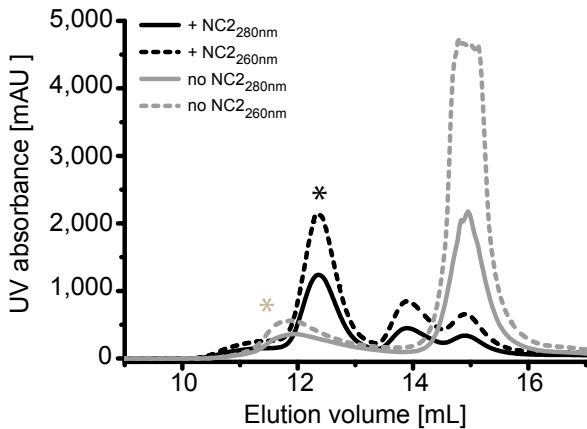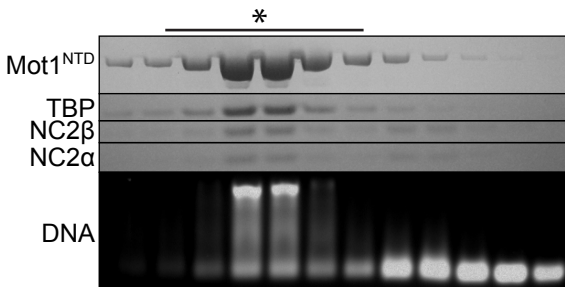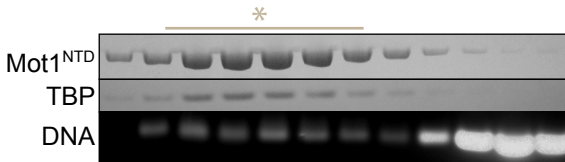

Supplement: supp [file elife-07432-supp-v1.zip › elife_poa_e07432_Figure_1_figure_supplement_1.pdf]

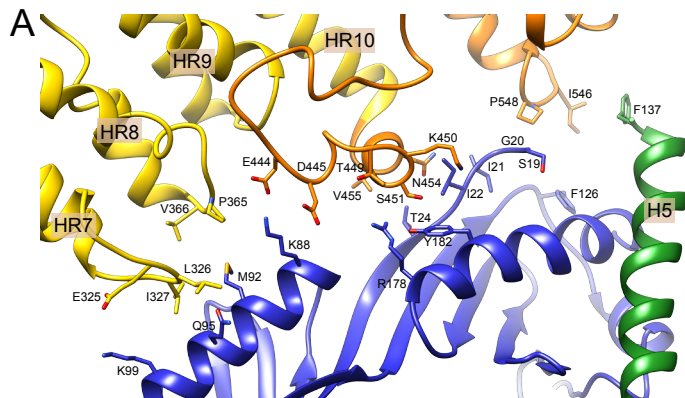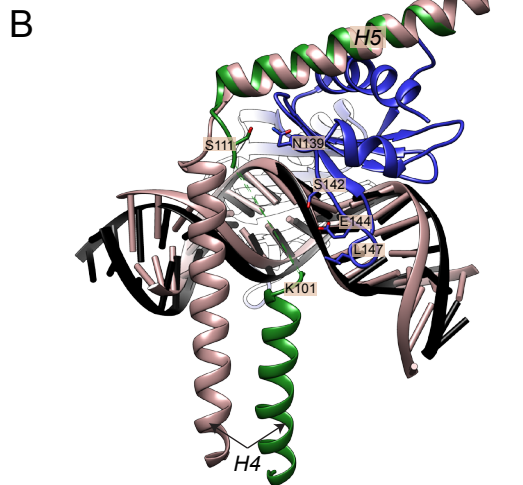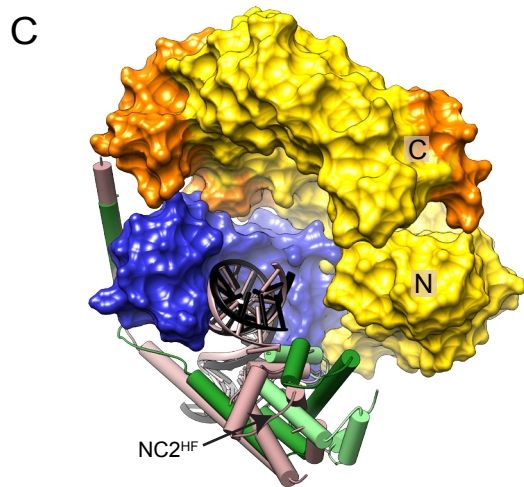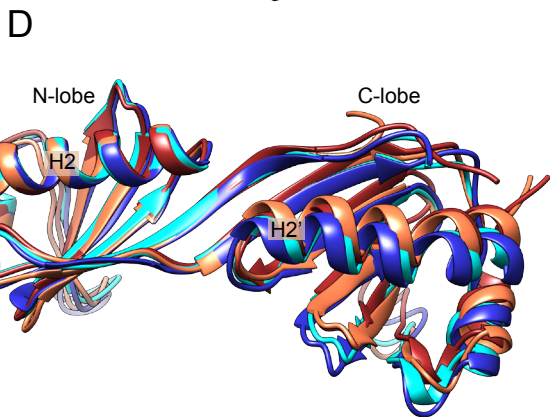

Supplement: supp [file elife-07432-supp-v1.zip › elife_poa_e07432_Figure_5_figure_supplement_1.pdf]

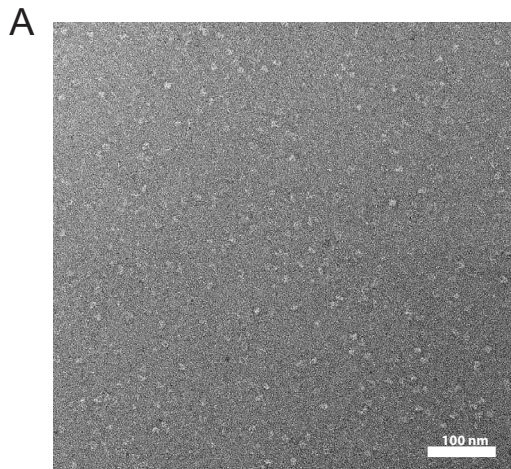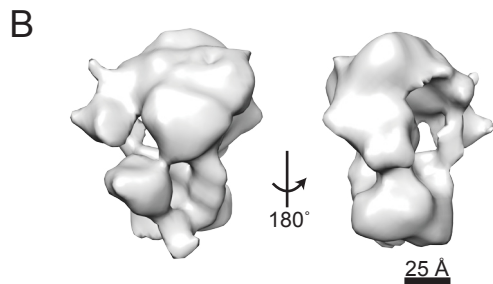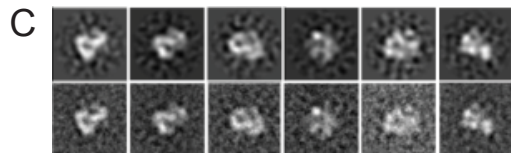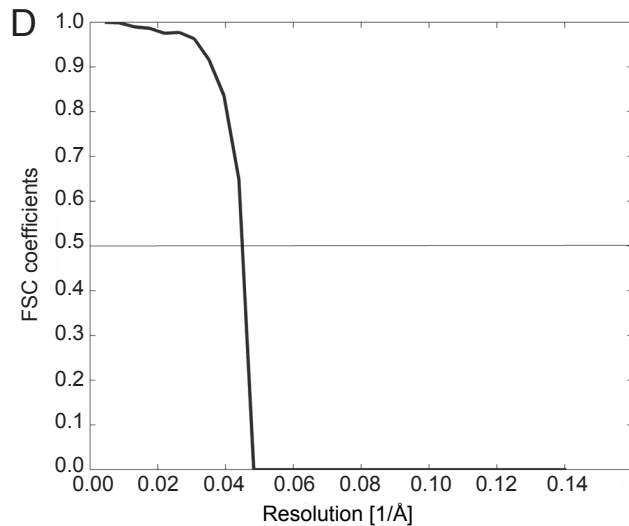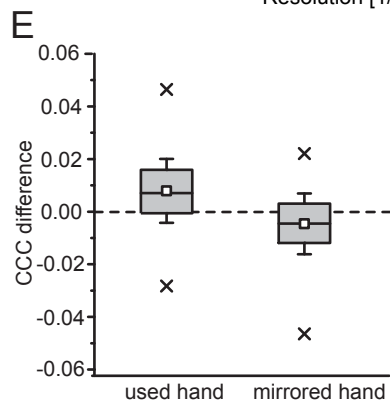

Supplement: supp [file elife-07432-supp-v1.zip › elife_poa_e07432_Figure_7_figure_supplement_1.pdf]
